# Supplementary material for: The role of CREG1 in megakaryocyte maturation and thrombocytopoiesis
Source: PubMed Central journal article supplement (PMC10367557; doi:10.7150/ijbs.78660), 2023-07-09
Supplement: ijbsv19p3614s1.pdf [file ijbsv19p3614s1.pdf]

# Supplemental figures

**Table 1**                      **The study population baseline data**

|                                            | total (n=20)       | control group      | patients           | T/ $\chi^2$ | P      |
|--------------------------------------------|--------------------|--------------------|--------------------|-------------|--------|
| age (years, $\bar{x}\pm S$ )               | 60.05 $\pm$ 6.37   | 59.70 $\pm$ 6.84   | 60.40 $\pm$ 6.20   | 0.240       | 0.813  |
| Sex [n(%)]                                 |                    |                    |                    |             |        |
| male                                       | 12(60.0)           | 6(60.0)            | 6(60.0)            | 0.000       | 1.000  |
| female                                     | 8(40.0)            | 4(40.0)            | 4(40.0)            |             |        |
| BMI (kg/m <sup>2</sup> )                   | 23.90 $\pm$ 2.37   | 23.80 $\pm$ 2.00   | 24.00 $\pm$ 2.80   | 0.184       | 0.856  |
| Hypertension [n(%)]                        |                    |                    |                    |             |        |
| yes                                        | 7 (35.0)           | 3(30.0)            | 4(40.0)            | 0.220       | 0.639  |
| no                                         | 13 (65.0)          | 7(70.0)            | 6(60.0)            |             |        |
| Diabetes [n(%)]                            |                    |                    |                    |             |        |
| yes                                        | 4(20.0)            | 1(10.0)            | 3(30.0)            | 0.313       | 0.576  |
| no                                         | 16(80.0)           | 9(90.0)            | 7(70.0)            |             |        |
| Smoke [n(%)]                               |                    |                    |                    |             |        |
| yes                                        | 8(40.0)            | 4(40.0)            | 4(40.0)            | 0.000       | 1.000  |
| no                                         | 12(60.0)           | 6(60.0)            | 6(60.0)            |             |        |
| Systolic pressure (mmHg, $\bar{x}\pm S$ )  | 128.5 $\pm$ 11.74  | 129.30 $\pm$ 11.30 | 127.70 $\pm$ 12.76 | -0.297      | 0.770  |
| diastolic pressure (mmHg, $\bar{x}\pm S$ ) | 70.45 $\pm$ 18.37  | 63.50 $\pm$ 23.05  | 77.40 $\pm$ 8.59   | 1.787       | 0.091  |
| WBC(10 <sup>9</sup> /L)                    | 6.37 $\pm$ 1.99    | 6.16 $\pm$ 2.00    | 6.59 $\pm$ 2.07    | 0.472       | 0.643  |
| RBC(10 <sup>12</sup> /L)                   | 4.29 $\pm$ 0.58    | 4.46 $\pm$ 0.51    | 4.13 $\pm$ 0.62    | -1.312      | 0.206  |
| PLT(10 <sup>9</sup> /L)                    | 174.05 $\pm$ 90.66 | 254.90 $\pm$ 47.63 | 93.2 $\pm$ 23.65   | -9.615      | <0.001 |
| ALT(u/L)                                   | 21.90 $\pm$ 9.92   | 23.37 $\pm$ 8.86   | 20.44 $\pm$ 11.16  | -0.652      | 0.523  |
| CKMB(u/L)                                  | 10.65 $\pm$ 4.38   | 9.70 $\pm$ 4.02    | 11.60 $\pm$ 4.71   | 0.968       | 0.346  |
| TG(mmol/L)                                 | 1.68 $\pm$ 2.65    | 1.25 $\pm$ 0.66    | 2.11 $\pm$ 3.74    | 0.713       | 0.485  |
| LDL-C(mmol/L)                              | 2.16 $\pm$ 0.84    | 2.34 $\pm$ 0.93    | 1.98 $\pm$ 0.75    | -0.938      | 0.361  |
| CHOL(mmol/L)                               | 4.23 $\pm$ 1.20    | 4.28 $\pm$ 1.38    | 4.18 $\pm$ 1.05    | -0.176      | 0.863  |
| CREA(umol/L)                               | 65.66 $\pm$ 11.01  | 65.98 $\pm$ 9.14   | 65.35 $\pm$ 13.13  | -0.126      | 0.901  |

Supplemental figure 1

A

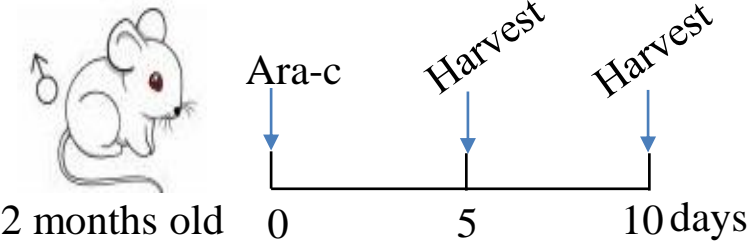

B

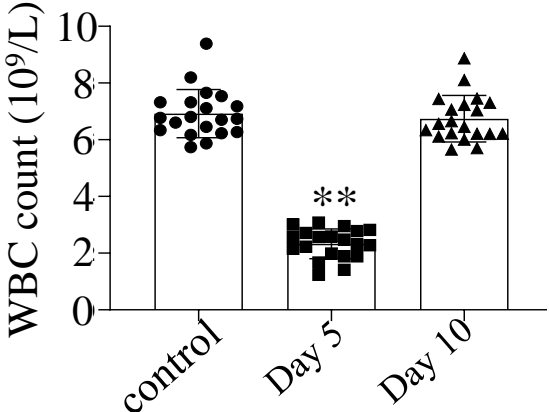

C

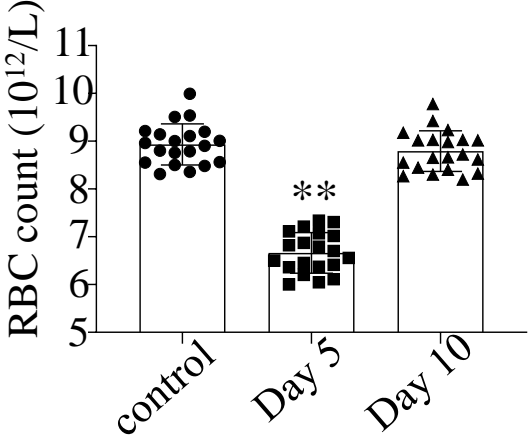

D

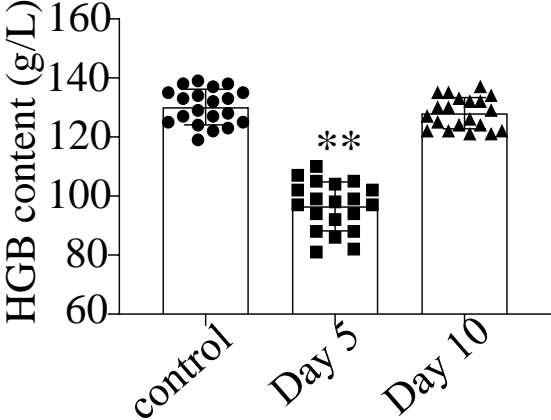

**Supplemental Figure 1.** WBC count, RBC count and HGB content in the peripheral blood of mice. (A) mice treated with Ara-c intraperitoneally. (B) WBC count. (C) RBC count. (D) HGB content. Values are presented as means  $\pm$  SEM. n=20 mice/group. \*\* $P < 0.01$  versus control. Ara-c: cytosine arabinoside.

# Supplemental figure 2

A

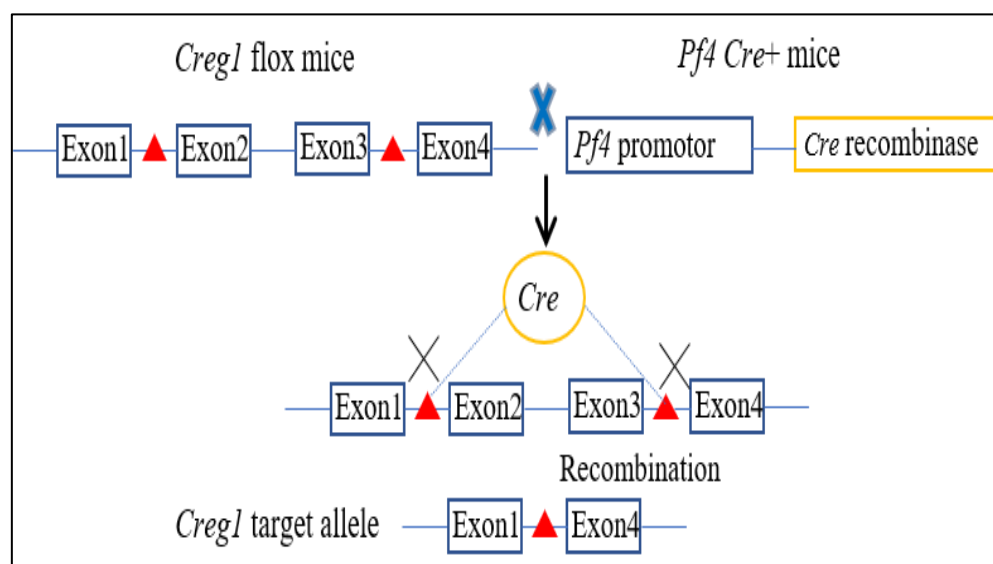

B

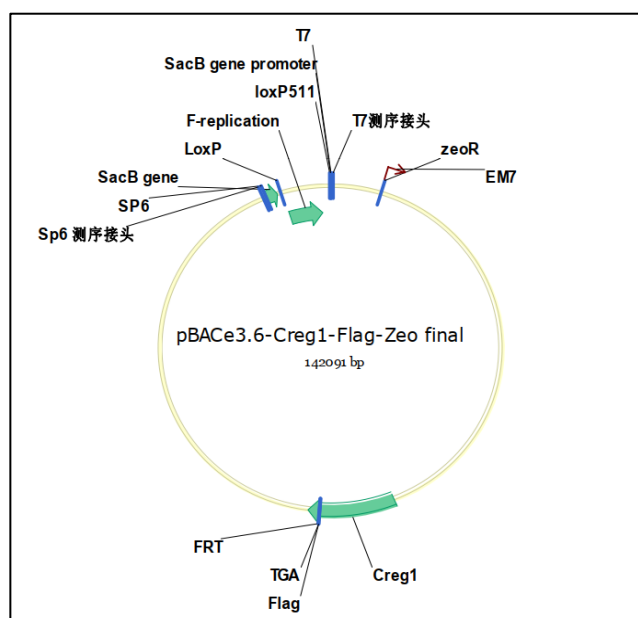

C

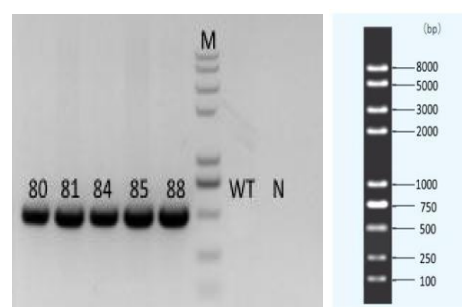

D

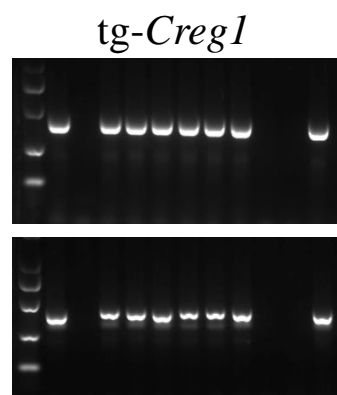

E

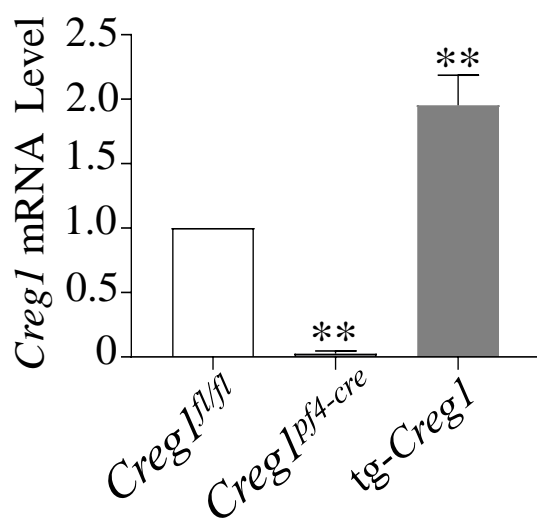

F

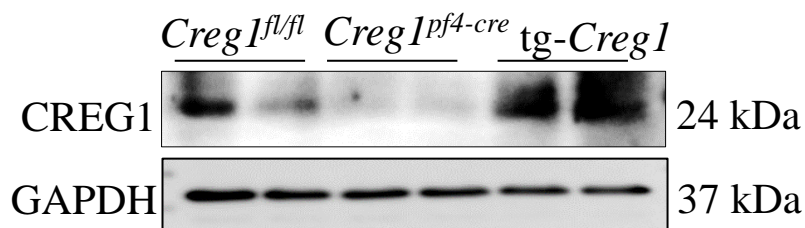

**Supplemental Figure 2.** (A-D) Generation of *Creg1<sup>pf4-cre</sup>* mice and tg-*Creg1* mice, and genotyped. (E-F) Quantitative real-time PCR (RT-PCR) and western blot confirmed the establishment of the model. Values are presented as means  $\pm$  SEM, n=3. \*\**P* < 0.01 versus *Creg1<sup>fl/fl</sup>*.

## Supplemental figure 3

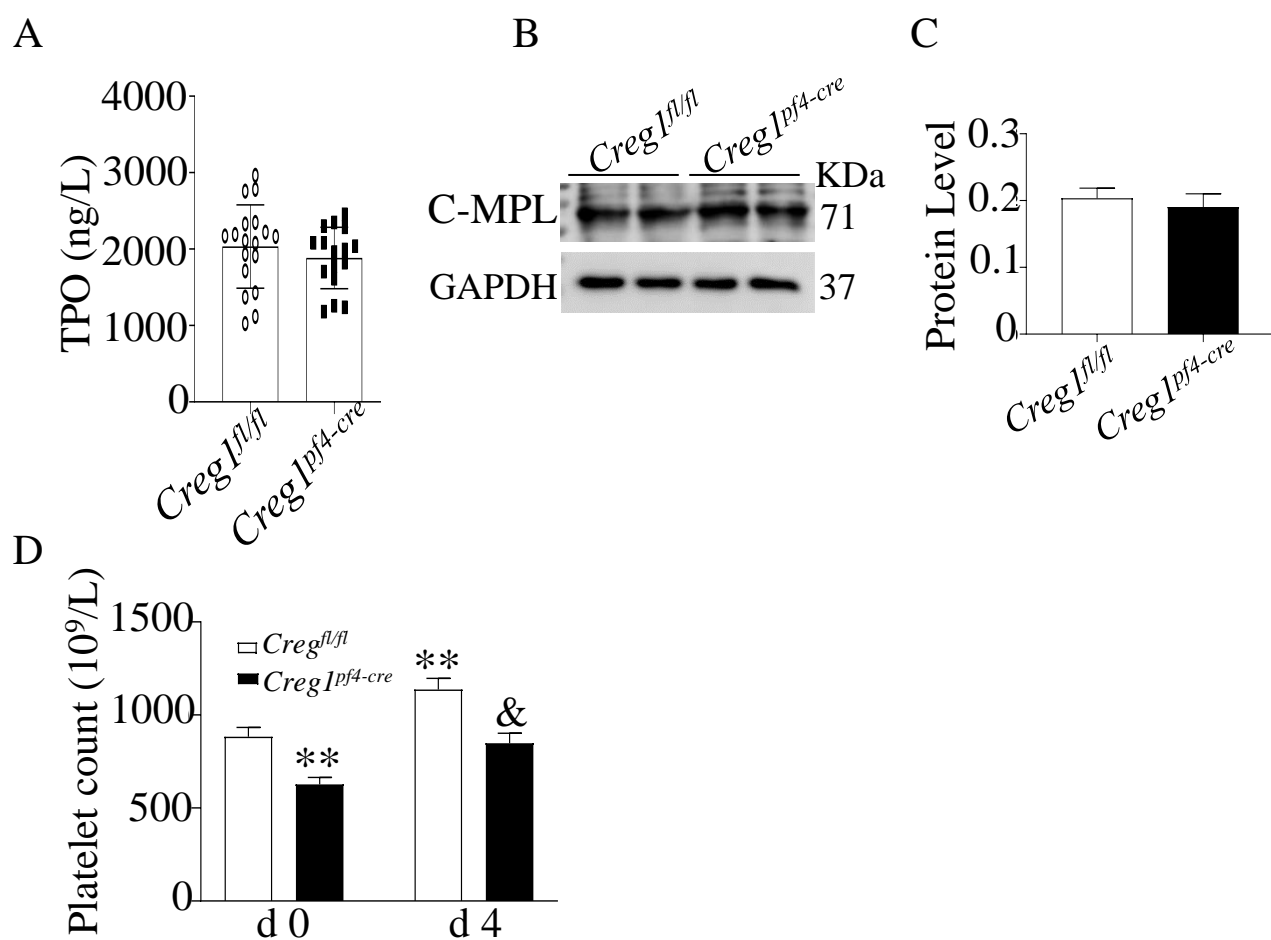

**Supplemental Figure 3.** The lack of CREG1 attenuated TPO signaling pathway. (A) TPO levels were determined in the serum of murine blood by using ELISA. (n=18). (B-C) Western blot was used to analyze C-MPL. (D) Platelet count after treatment with TPO (2  $\mu$ g/animal per day). (n=3). Values are presented as means  $\pm$  SEM. \*\* $P < 0.01$  versus *Creg1<sup>fl/fl</sup>*, & $P < 0.01$  versus *Creg1<sup>pf4-cre</sup>* d 0.

# Supplemental figure 4

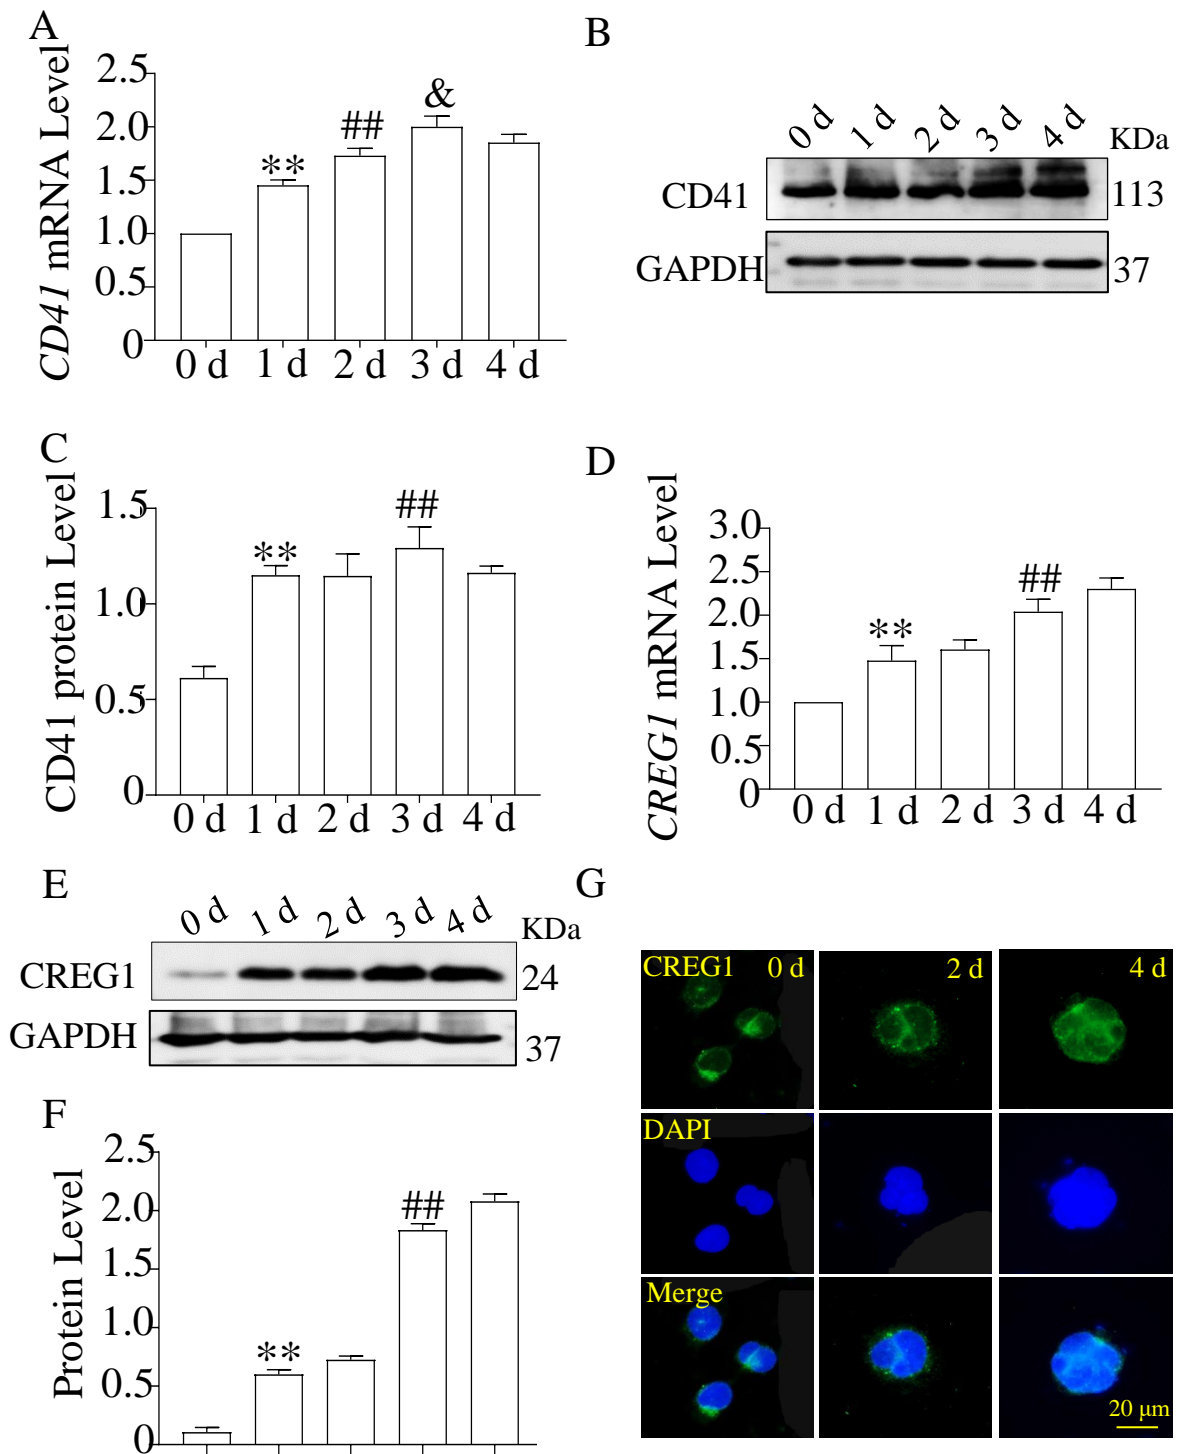

**Supplemental figure 4.** Expression of CREG1 in Dami cells was increased when stimulated by PMA. (A-C) Expression of CD41 was determined by real-time PCR and western blot after PMA treatment for 1 to 4 days. (n=3). (D-F) Expression of CREG1 was determined by real-time PCR and western blot after PMA treatment for 1 to 4 days. (n=3). (G) The localization and expression of CREG1 in Dami cells were determined by performing immunofluorescence staining. (n=5). Values are presented as means  $\pm$  SEM. \*\* $P < 0.01$  versus control, ## $P < 0.01$  versus 1 d, & $P < 0.01$  versus 2 d.



Supplemental figure 5

A

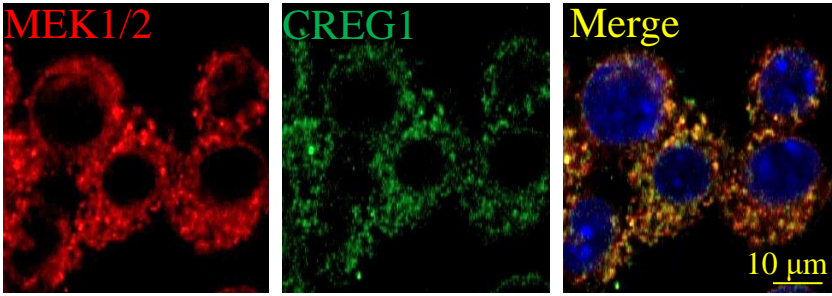

B

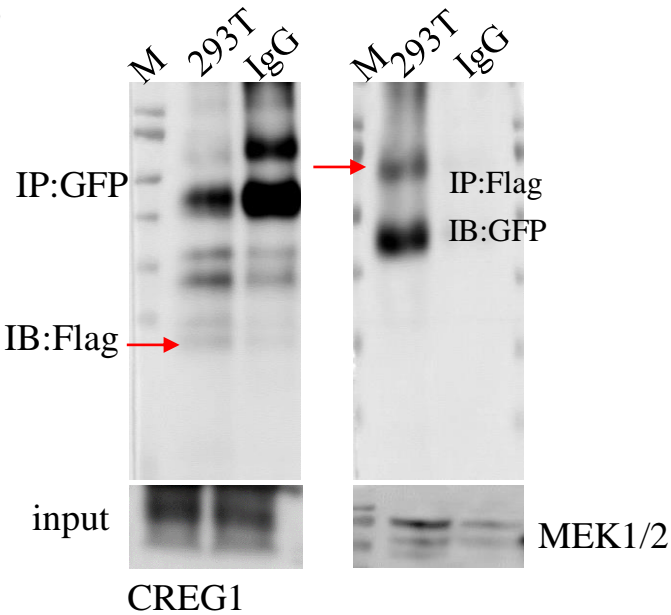

**Supplemental figure 5.** CREG1 directly combined with MEK1/2 in 293T cell. (A) Immunofluorescence staining of MEK1/2 and CREG1 in 293T cells. (B) Co-immunoprecipitation of MEK1 and CREG1 in 293T cells. (n=3).

# Supplemental figure 6

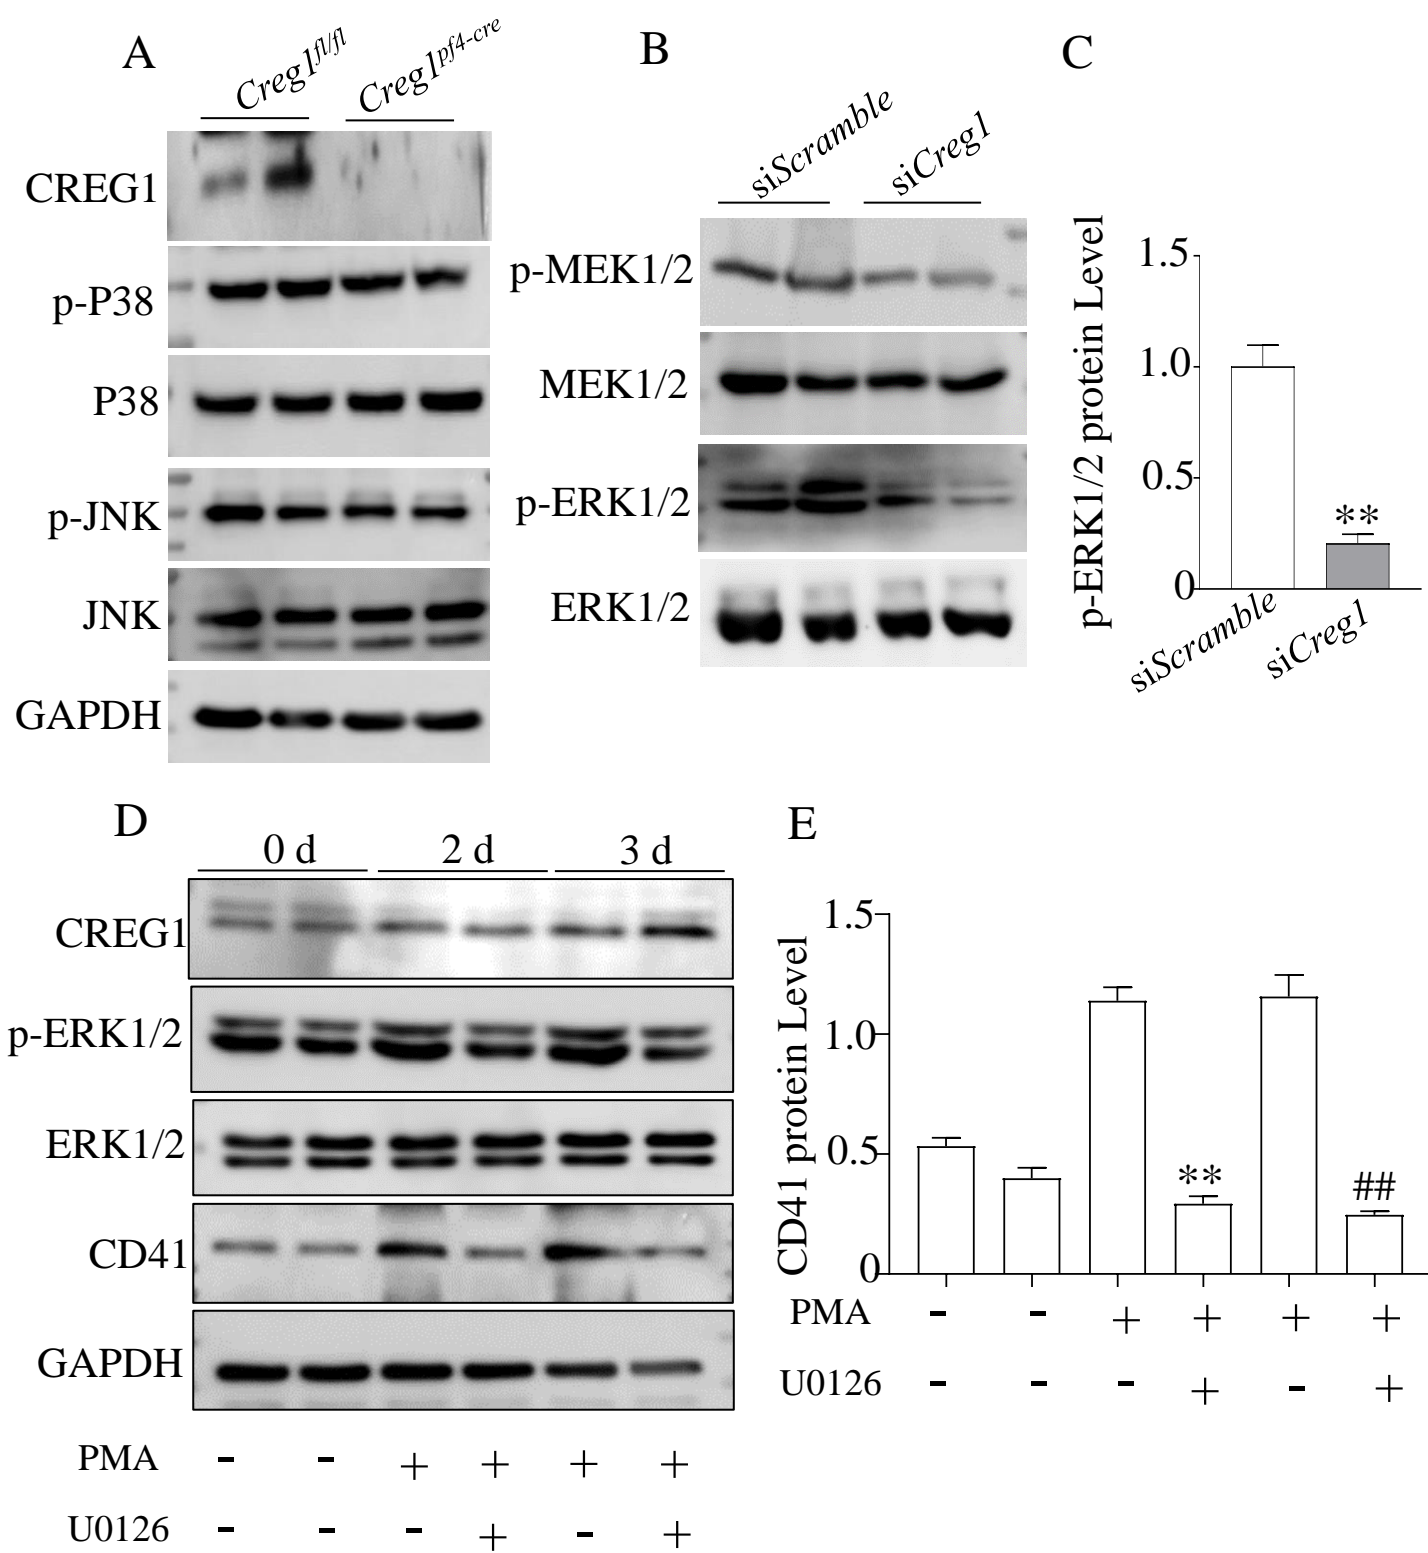

**Supplemental figure 6.** MEK1/2-ERK1/2 phosphorylation signaling pathways were abnormal when CREG1 silenced. (A) Expression of p-P38 and p-JNK was determined by western blot in *Creg1<sup>pf4-cre</sup>* mice (n=3). (B-C) Expression of p-MEK1/2 and p-ERK1/2 was determined by western blot in Dami cells (n=3). (D-E) Expression of CREG1, CD41 and p-ERK1/2 was detected by western blot (n=3). Values are presented as means  $\pm$  SEM. \*\* $P < 0.01$  versus control or 2 d, ## $P < 0.01$  versus 3 d.

Supplemental figure 7

A

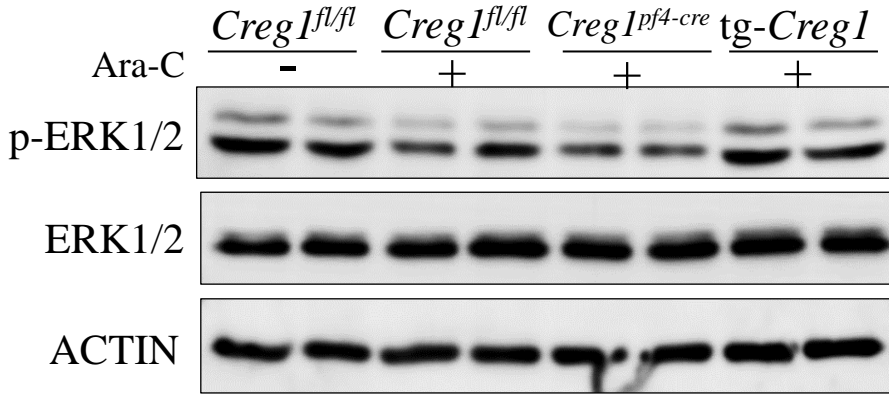

B

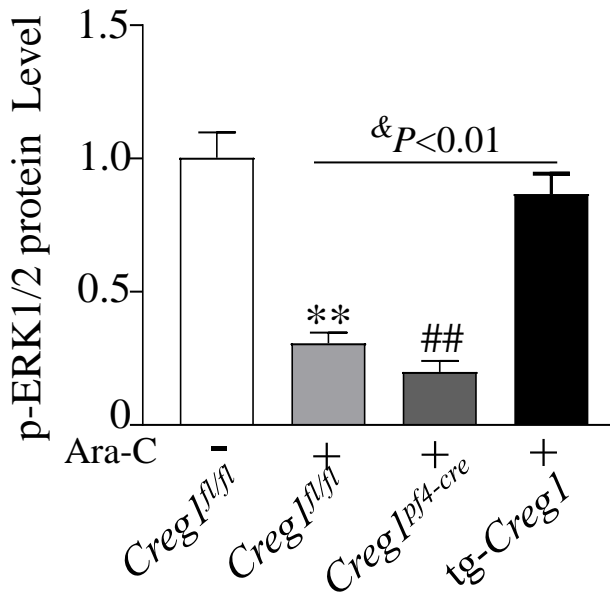

**Supplemental figure 7.** (A-B) Expression of p-ERK1/2 phosphorylation was determined by western blot (n=3). Values are presented as means  $\pm$  SEM. \*\*P < 0.01 versus *Creg1<sup>fl/fl</sup>*, ##P < 0.01 versus *Creg1<sup>fl/fl</sup>* +Ara-c, &P < 0.01 versus *Creg1<sup>fl/fl</sup>* +Ara-c.

Supplemental figure 8

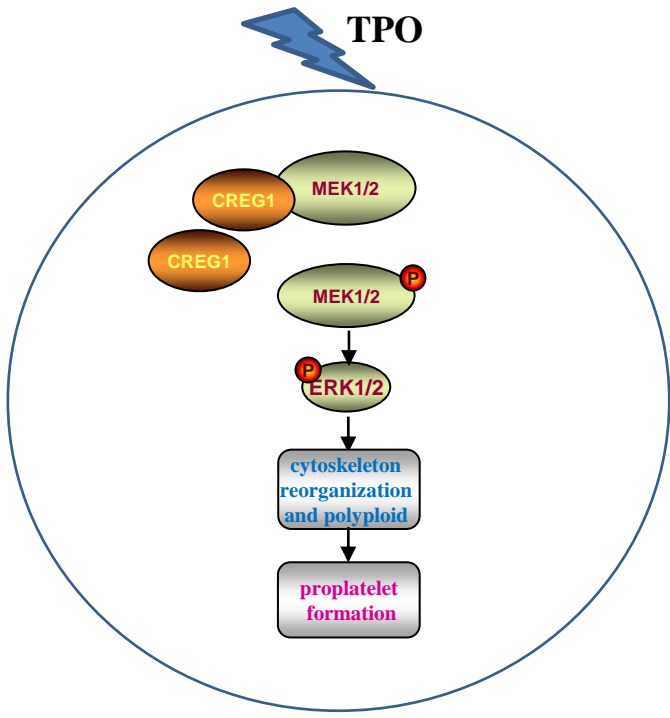

**Supplemental Figure 8.** A schematic picture was demonstrated how CREG1 regulated megakaryocytes differentiation and thrombopoiesis.
